# Supplementary material
Source: PubMed Central journal article supplement (PMC5038025)
Supplement: AEM.01751-16_zam999117444so1.pdf [file AEM.01751-16_zam999117444so1.pdf]

Figure S1.  
UniFrac distance based hierarchical clustering (UPGMA) of total microbial communities (**bold**) and cultured microbial communities (*italicized*) from various habitats during the months of May (M) and July (J).

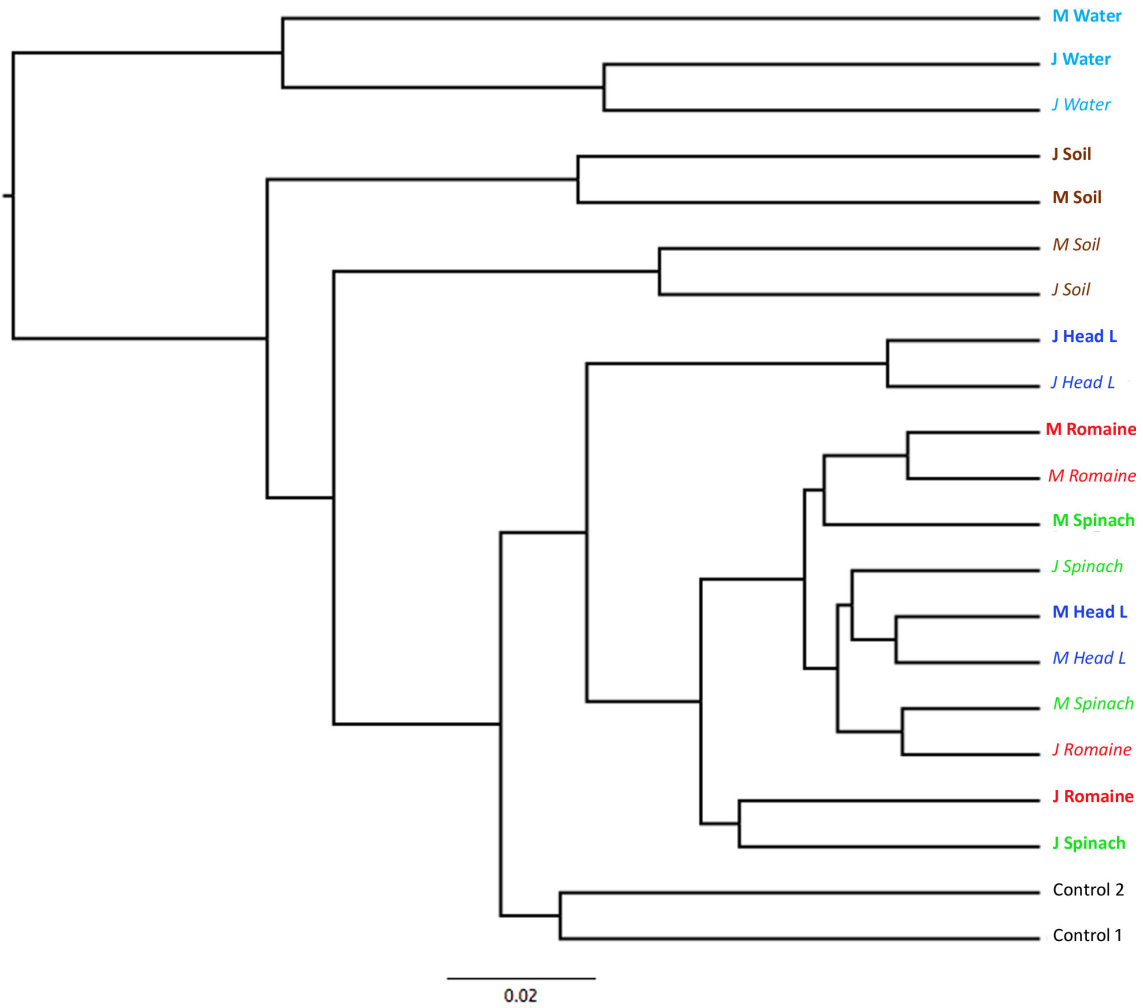

Figure S2.

UniFrac distance based hierarchical clustering (UPGMA) of culture-independent microbial communities from individual leaf samples of head lettuce, romaine and spinach during the months of May (M) and July (J). Colors denote the proportion of surfactant producers observed from the samples when cultured (blue 0-15%, green 16-30%, yellow 31-50%, red 51-100%). One sample (J Head L) did not yield isolates when cultured and thus is not color-coded.

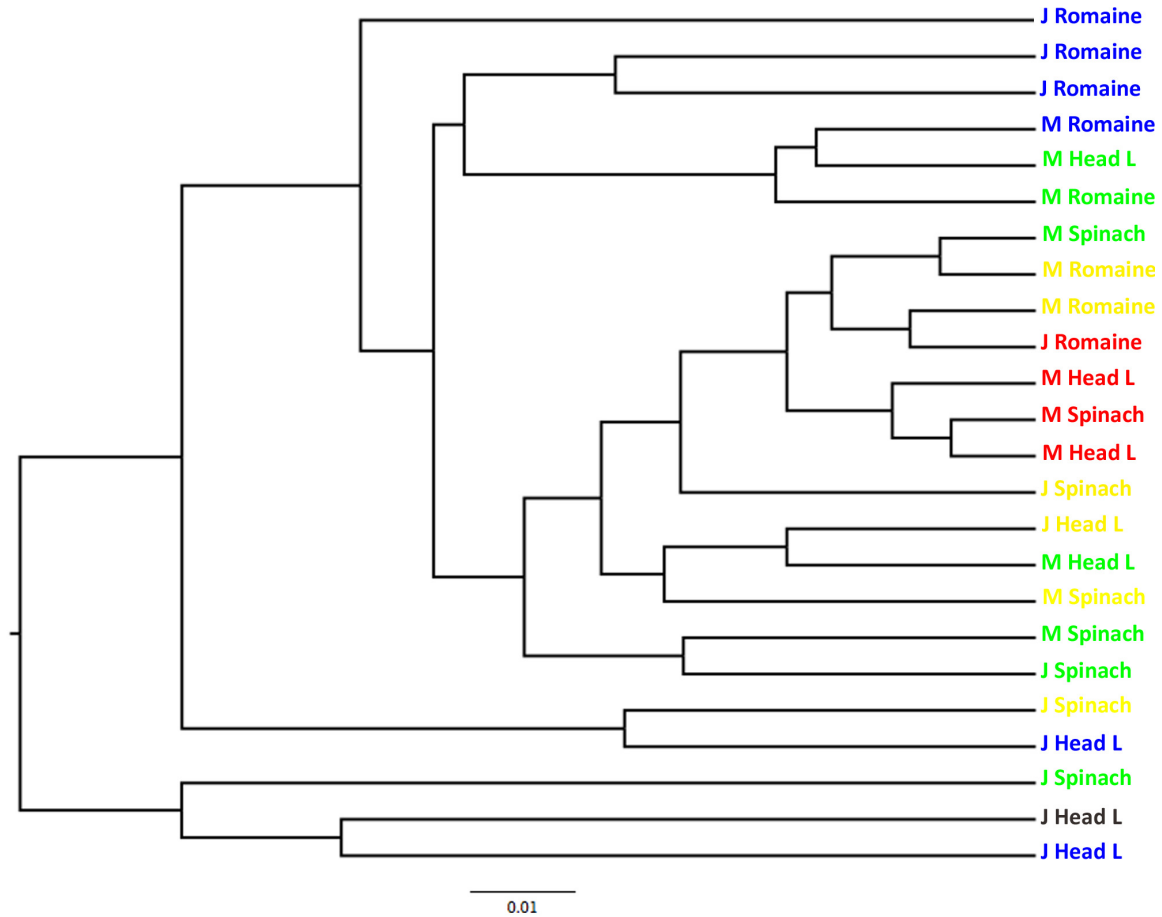

Table S1.

List of the OTUs that were most prevalent (>0.2% total reads) in plant samples (top) and soil samples (bottom). OTUs without cultured representatives are in red.

| % Plant reads | Taxonomy                                                                          |
|---------------|-----------------------------------------------------------------------------------|
| 29.54         | o__Pseudomonadales; f__Pseudomonadaceae; g__Pseudomonas                           |
| 13.84         | o__Enterobacteriales; f__Enterobacteriaceae                                       |
| 13.13         | o__Pseudomonadales; f__Pseudomonadaceae; g__Pseudomonas; s__viridiflava           |
| 7.38          | o__Burkholderiales; f__Oxalobacteraceae; g__Janthinobacterium; s__                |
| 3.12          | o__Burkholderiales; f__Oxalobacteraceae; g__Janthinobacterium; s__                |
| 2.87          | o__Enterobacteriales; f__Enterobacteriaceae; g__Erwinia; s__                      |
| 1.62          | o__Rhizobiales; f__Rhizobiaceae; g__Agrobacterium; s__                            |
| 1.41          | o__Enterobacteriales; f__Enterobacteriaceae                                       |
| 1.25          | o__Xanthomonadales; f__Xanthomonadaceae                                           |
| 1.13          | o__Enterobacteriales; f__Enterobacteriaceae; g__Buchnera; s__                     |
| 1.05          | o__Enterobacteriales; f__Enterobacteriaceae; g__Erwinia; s__                      |
| 0.94          | o__Pseudomonadales; f__Pseudomonadaceae                                           |
| 0.90          | o__Pseudomonadales; f__Moraxellaceae; g__Alkanindiges; s__                        |
| 0.86          | o__Bacillales; f__Bacillaceae; g__Bacillus; s__flexus                             |
| 0.84          | o__Enterobacteriales; f__Enterobacteriaceae                                       |
| 0.78          | o__Flavobacteriales; f__Flavobacteriaceae; g__Flavobacterium; s__succinicans      |
| 0.70          | o__Pseudomonadales; f__Pseudomonadaceae                                           |
| 0.67          | o__Burkholderiales; f__Oxalobacteraceae; g__Janthinobacterium; s__                |
| 0.61          | c__Gammaproteobacteria                                                            |
| 0.45          | c__Gammaproteobacteria                                                            |
| 0.44          | o__Burkholderiales; f__Oxalobacteraceae                                           |
| 0.42          | o__Enterobacteriales; f__Enterobacteriaceae; g__Erwinia                           |
| 0.38          | o__Actinomycetales; f__Micrococcaceae; g__; s__                                   |
| 0.35          | o__Flavobacteriales; f__Flavobacteriaceae; g__Chryseobacterium; s__               |
| 0.34          | o__Exiguobacteriales; f__Exiguobacteraceae; g__Exiguobacterium; s__indicum        |
| 0.34          | o__Burkholderiales; f__Oxalobacteraceae; g__; s__                                 |
| 0.31          | o__Xanthomonadales; f__Xanthomonadaceae; g__Stenotrophomonas                      |
| 0.29          | o__Flavobacteriales; f__Flavobacteriaceae; g__Chryseobacterium; s__               |
| 0.28          | o__Burkholderiales; f__Comamonadaceae; g__Limnohabitans; s__                      |
| 0.27          | o__Burkholderiales; f__Comamonadaceae                                             |
| 0.27          | o__Sphingobacteriales; f__Sphingobacteriaceae; g__Sphingobacterium; s__multivorum |
| 0.25          | o__Methylophilales; f__Methylophilaceae; g__Methylotenera; s__                    |
| 0.25          | o__Enterobacteriales; f__Enterobacteriaceae; g__Erwinia; s__                      |
| 0.24          | o__Exiguobacteriales; f__Exiguobacteraceae; g__Exiguobacterium; s__indicum        |
| 0.24          | o__Pseudomonadales; f__Pseudomonadaceae                                           |
| 0.24          | c__Gammaproteobacteria                                                            |
| 0.22          | o__Pseudomonadales; f__Pseudomonadaceae; g__Pseudomonas                           |

0.22 o\_\_Actinomycetales; f\_\_Microbacteriaceae; g\_\_Microbacterium; s\_\_  
0.21 o\_\_Burkholderiales; f\_\_Alcaligenaceae; g\_\_Achromobacter; s\_\_  
0.21 o\_\_Aeromonadales; f\_\_; g\_\_; s\_\_

% Soil  
reads

Taxonomy

---

8.65 o\_\_Pseudomonadales; f\_\_Pseudomonadaceae; g\_\_Pseudomonas  
8.05 o\_\_Bacillales; f\_\_Bacillaceae; g\_\_Bacillus; s\_\_flexus  
1.70 o\_\_Rubrobacterales; f\_\_Rubrobacteraceae; g\_\_Rubrobacter; s\_\_  
1.65 o\_\_Flavobacteriales; f\_\_Flavobacteriaceae; g\_\_Flavobacterium; s\_\_succinicans  
1.63 o\_\_Xanthomonadales; f\_\_Xanthomonadaceae  
1.63 o\_\_Xanthomonadales; f\_\_Xanthomonadaceae; g\_\_Thermomonas; s\_\_  
1.48 o\_\_Sphingobacteriales; f\_\_Chitinophagaceae; g\_\_Flavisolibacter; s\_\_  
1.45 o\_\_Bacillales  
1.28 o\_\_Nitrosomonadales; f\_\_Nitrosomonadaceae; g\_\_; s\_\_  
1.03 o\_\_Actinomycetales; f\_\_Micrococcaceae  
1.00 o\_\_Sphingomonadales; f\_\_Sphingomonadaceae; g\_\_Kaistobacter; s\_\_  
0.93 o\_\_Bacillales; f\_\_Bacillaceae  
0.93 o\_\_N1423WL; f\_\_; g\_\_; s\_\_  
0.90 o\_\_Burkholderiales; f\_\_Oxalobacteraceae  
0.88 o\_\_Pseudomonadales; f\_\_Pseudomonadaceae  
0.88 o\_\_Sphingobacteriales; f\_\_Chitinophagaceae; g\_\_Flavisolibacter; s\_\_  
0.78 o\_\_Xanthomonadales; f\_\_Xanthomonadaceae; g\_\_Thermomonas; s\_\_  
0.73 o\_\_Flavobacteriales; f\_\_Flavobacteriaceae; g\_\_Gillisia; s\_\_  
0.73 o\_\_Burkholderiales; f\_\_Oxalobacteraceae; g\_\_Janthinobacterium; s\_\_  
0.73 o\_\_Rhodospirillales; f\_\_Rhodospirillaceae; g\_\_Skermanella; s\_\_  
0.70 o\_\_Xanthomonadales; f\_\_Xanthomonadaceae; g\_\_Lysobacter; s\_\_  
0.70 o\_\_Bacillales; f\_\_Bacillaceae  
0.63 o\_\_Methylophilales; f\_\_Methylophilaceae  
0.60 o\_\_Pseudomonadales; f\_\_Pseudomonadaceae; g\_\_Pseudomonas; s\_\_stutzeri  
0.58 o\_\_Rhodobacterales; f\_\_Rhodobacteraceae; g\_\_Rhodobacter; s\_\_  
0.58 o\_\_Burkholderiales; f\_\_Comamonadaceae; g\_\_Ramlibacter; s\_\_  
0.55 o\_\_Xanthomonadales; f\_\_Xanthomonadaceae; g\_\_Lysobacter; s\_\_  
0.55 o\_\_[Pedosphaerales]; f\_\_Ellin517; g\_\_; s\_\_  
0.55 c\_\_Gemmatimonadetes; o\_\_; f\_\_; g\_\_; s\_\_  
0.55 c\_\_JL-ETNP-Z39; o\_\_; f\_\_; g\_\_; s\_\_  
0.53 o\_\_Burkholderiales; f\_\_Alcaligenaceae; g\_\_Achromobacter; s\_\_  
0.53 o\_\_Sphingobacteriales; f\_\_Flexibacteraceae; g\_\_Pontibacter; s\_\_  
0.53 o\_\_Nitrospirales; f\_\_Nitrospiraceae; g\_\_Nitrospira; s\_\_  
0.50 o\_\_Rhizobiales; f\_\_Phyllobacteriaceae  
0.48 o\_\_Xanthomonadales; f\_\_Xanthomonadaceae; g\_\_Stenotrophomonas  
0.45 o\_\_Sphingobacteriales; f\_\_Flexibacteraceae; g\_\_Adhaeribacter; s\_\_  
0.45 o\_\_Sphingobacteriales; f\_\_Flammeovirgaceae; g\_\_A4; s\_\_

0.45 o\_\_Syntrophobacterales; f\_\_Syntrophobacteraceae; g\_\_ ; s\_\_  
0.45 o\_\_Actinomycetales; f\_\_Micrococcaceae; g\_\_ ; s\_\_  
0.45 o\_\_Myxococcales; f\_\_Myxococcaceae  
0.43 o\_\_Rhodospirillales; f\_\_Rhodospirillaceae; g\_\_Skermanella; s\_\_  
0.43 o\_\_Sphingobacteriales; f\_\_Chitinophagaceae  
0.43 c\_\_Gemm-5; o\_\_ ; f\_\_ ; g\_\_ ; s\_\_  
0.43 o\_\_Thiotrichales; f\_\_Piscirickettsiaceae; g\_\_Methylophaga; s\_\_  
0.40 o\_\_Sphingomonadales; f\_\_Erythrobacteraceae; g\_\_ ; s\_\_  
0.40 p\_\_Chloroflexi; c\_\_TK17; o\_\_S085; f\_\_ ; g\_\_ ; s\_\_  
0.38 o\_\_Sphingobacteriales; f\_\_Chitinophagaceae; g\_\_Segetibacter; s\_\_  
0.38 o\_\_Solibacterales; f\_\_Solibacteraceae; g\_\_Candidatus Solibacter; s\_\_  
0.38 o\_\_Myxococcales; f\_\_Cystobacteraceae; g\_\_ ; s\_\_  
0.35 o\_\_Burkholderiales; f\_\_Oxalobacteraceae; g\_\_Janthinobacterium; s\_\_  
0.33 o\_\_Solirubrobacterales; f\_\_Solirubrobacteraceae  
0.33 o\_\_Sphingobacteriales; f\_\_Saprosiraceae; g\_\_ ; s\_\_  
0.33 c\_\_Gemmatimonadetes  
0.33 o\_\_Gemmatimonadales; f\_\_Ellin5301; g\_\_ ; s\_\_  
0.30 o\_\_Sphingobacteriales; f\_\_Flexibacteraceae; g\_\_ ; s\_\_  
0.30 o\_\_Rhodospirillales; f\_\_Rhodospirillaceae; g\_\_Skermanella; s\_\_  
0.30 o\_\_Solirubrobacterales; f\_\_ ; g\_\_ ; s\_\_  
0.30 c\_\_Gemmatimonadetes; o\_\_ ; f\_\_ ; g\_\_ ; s\_\_  
0.30 c\_\_Betaproteobacteria; o\_\_SC-I-84; f\_\_ ; g\_\_ ; s\_\_  
0.30 o\_\_Myxococcales; f\_\_Nannocystaceae; g\_\_Nannocystis; s\_\_  
0.28 o\_\_Caulobacterales; f\_\_Caulobacteraceae  
0.28 o\_\_Gaiellales; f\_\_Gaiellaceae; g\_\_ ; s\_\_  
0.28 o\_\_Burkholderiales; f\_\_Comamonadaceae; g\_\_Methylibium; s\_\_  
0.28 k\_\_Bacteria  
0.28 o\_\_Hydrogenophilales; f\_\_Hydrogenophilaceae; g\_\_Thiobacillus; s\_\_  
0.28 o\_\_Xanthomonadales; f\_\_Xanthomonadaceae  
0.28 o\_\_[Pedosphaerales]; f\_\_ ; g\_\_ ; s\_\_  
0.25 o\_\_Actinomycetales; f\_\_Nocardiodaceae; g\_\_ ; s\_\_  
0.25 o\_\_Actinomycetales; f\_\_Nocardiodaceae; g\_\_Aeromicrobium; s\_\_  
0.25 o\_\_Nitrospirales; f\_\_Nitrospiraceae; g\_\_Nitrospira; s\_\_  
0.25 o\_\_Bacillales; f\_\_Bacillaceae  
0.23 o\_\_Xanthomonadales; f\_\_Sinobacteraceae; g\_\_ ; s\_\_  
0.23 o\_\_Xanthomonadales; f\_\_Xanthomonadaceae; g\_\_Thermomonas; s\_\_  
0.20 o\_\_Burkholderiales; f\_\_Oxalobacteraceae  
0.20 o\_\_Xanthomonadales; f\_\_Sinobacteraceae; g\_\_Steroidobacter; s\_\_  
0.20 o\_\_Sphingomonadales; f\_\_Sphingomonadaceae; g\_\_ ; s\_\_

Table S2. Culturability, prevalence, and surfactant production of OTUs.

| Culturability | % of total | % surfactant | Taxonomy                                                                     |
|---------------|------------|--------------|------------------------------------------------------------------------------|
| 0.00          | 0.08       |              | o__Solibacterales; f__Solibacteraceae; g__Candidatus Solibacter; s__         |
| 0.00          | 0.05       |              | o__Actinomycetales; f__Geodermatophilaceae                                   |
| 0.00          | 0.04       |              | o__Actinomycetales; f__Intrasporangiaceae                                    |
| 0.00          | 0.05       |              | o__Actinomycetales; f__Intrasporangiaceae; g__; s__                          |
| 0.00          | 0.16       |              | o__Actinomycetales; f__Microbacteriaceae; g__Microbacterium; s__             |
| 0.08          | 0.28       | 0.00         | o__Actinomycetales; f__Micrococcaceae                                        |
| 0.11          | 0.37       | 0.00         | o__Actinomycetales; f__Micrococcaceae; g__; s__                              |
| 0.00          | 0.05       |              | o__Actinomycetales; f__Nocardiaceae; g__Rhodococcus; s__                     |
| 0.00          | 0.06       |              | o__Actinomycetales; f__Nocardioidaceae; g__; s__                             |
| 0.00          | 0.06       |              | o__Actinomycetales; f__Nocardioidaceae; g__; s__                             |
| 0.00          | 0.05       |              | o__Actinomycetales; f__Nocardioidaceae; g__Aeromicrobium; s__                |
| 0.00          | 0.06       |              | o__Actinomycetales; f__Sporichthyaceae; g__; s__                             |
| 0.00          | 0.39       |              | o__Rubrobacterales; f__Rubrobacteraceae; g__Rubrobacter; s__                 |
| 0.00          | 0.06       |              | o__Gaiellales; f__Gaiellaceae; g__; s__                                      |
| 0.00          | 0.06       |              | o__Solirubrobacterales; f__; g__; s__                                        |
| 0.00          | 0.08       |              | o__Solirubrobacterales; f__Solirubrobacteraceae                              |
| 2.95          | 0.09       | 0.00         | o__Flavobacteriales; f__Flavobacteriaceae                                    |
| 0.00          | 0.08       |              | o__Flavobacteriales; f__Flavobacteriaceae                                    |
| 4.64          | 0.21       | 0.80         | o__Flavobacteriales; f__Flavobacteriaceae; g__Chryseobacterium; s__          |
| 3.23          | 0.26       | 0.72         | o__Flavobacteriales; f__Flavobacteriaceae; g__Chryseobacterium; s__          |
| 0.00          | 0.11       |              | o__Flavobacteriales; f__Flavobacteriaceae; g__Chryseobacterium; s__joostei   |
| 1.96          | 0.16       | 0.00         | o__Flavobacteriales; f__Flavobacteriaceae; g__Flavobacterium                 |
| 2.45          | 0.07       | 0.00         | o__Flavobacteriales; f__Flavobacteriaceae; g__Flavobacterium                 |
| 0.64          | 0.09       | 0.00         | o__Flavobacteriales; f__Flavobacteriaceae; g__Flavobacterium                 |
| 0.00          | 0.10       |              | o__Flavobacteriales; f__Flavobacteriaceae; g__Flavobacterium; s__            |
| 0.68          | 1.07       | 0.00         | o__Flavobacteriales; f__Flavobacteriaceae; g__Flavobacterium; s__succinicans |
| 0.00          | 0.04       |              | o__Flavobacteriales; f__Flavobacteriaceae; g__Flavobacterium; s__succinicans |
| 0.00          | 0.17       |              | o__Flavobacteriales; f__Flavobacteriaceae; g__Gillisia; s__                  |
| 0.00          | 0.11       |              | o__Sphingobacteriales; f__Chitinophagaceae                                   |
| 0.00          | 0.11       |              | o__Sphingobacteriales; f__Chitinophagaceae                                   |
| 0.00          | 0.04       |              | o__Sphingobacteriales; f__Chitinophagaceae; g__; s__                         |
| 0.00          | 0.23       |              | o__Sphingobacteriales; f__Chitinophagaceae; g__Flavisolibacter; s__          |
| 0.00          | 0.36       |              | o__Sphingobacteriales; f__Chitinophagaceae; g__Flavisolibacter; s__          |
| 0.00          | 0.08       |              | o__Sphingobacteriales; f__Chitinophagaceae; g__Segetibacter; s__             |
| 0.00          | 0.10       |              | o__Sphingobacteriales; f__Flammeovirgaceae; g__A4; s__                       |
| 0.95          | 1.85       | 0.00         | o__Sphingobacteriales; f__Flexibacteraceae                                   |
| 0.00          | 0.08       |              | o__Sphingobacteriales; f__Flexibacteraceae; g__; s__                         |
| 0.00          | 0.06       |              | o__Sphingobacteriales; f__Flexibacteraceae; g__Adhaeribacter; s__            |
| 0.00          | 0.11       |              | o__Sphingobacteriales; f__Flexibacteraceae; g__Adhaeribacter; s__            |
| 0.00          | 0.11       |              | o__Sphingobacteriales; f__Flexibacteraceae; g__Pontibacter; s__              |

|       |      |      |                                                                                   |
|-------|------|------|-----------------------------------------------------------------------------------|
| 0.00  | 0.06 |      | o__Sphingobacteriales; f__Flexibacteraceae; g__Pontibacter; s__korkensis          |
| 0.00  | 0.07 |      | o__Sphingobacteriales; f__Saprospiraceae; g__; s__                                |
| 3.93  | 0.05 | 0.00 | o__Sphingobacteriales; f__Sphingobacteriaceae; g__; s__                           |
| 0.10  | 0.51 | 0.00 | o__Sphingobacteriales; f__Sphingobacteriaceae; g__; s__                           |
| 0.00  | 0.05 |      | o__Sphingobacteriales; f__Sphingobacteriaceae; g__; s__                           |
| 0.00  | 0.12 |      | o__Sphingobacteriales; f__Sphingobacteriaceae; g__Pedobacter; s__                 |
| 0.25  | 0.19 | 0.67 | o__Sphingobacteriales; f__Sphingobacteriaceae; g__Sphingobacterium; s__multivorum |
| 0.00  | 0.09 |      | p__Chloroflexi; c__TK17; o__S085; f__; g__; s__                                   |
| 3.14  | 0.01 | 0.00 | o__Bacillales                                                                     |
| 0.00  | 0.40 |      | o__Bacillales                                                                     |
| 0.51  | 0.32 | 0.00 | o__Bacillales; f__Bacillaceae                                                     |
| 0.00  | 0.05 |      | o__Bacillales; f__Bacillaceae                                                     |
| 0.00  | 0.16 |      | o__Bacillales; f__Bacillaceae                                                     |
| 14.76 | 0.02 | 0.00 | o__Bacillales; f__Bacillaceae; g__Bacillus                                        |
| 4.54  | 0.03 | 0.00 | o__Bacillales; f__Bacillaceae; g__Bacillus                                        |
| 4.00  | 0.01 | 1.00 | o__Bacillales; f__Bacillaceae; g__Bacillus; s__                                   |
| 8.89  | 0.02 | 0.00 | o__Bacillales; f__Bacillaceae; g__Bacillus; s__firmus                             |
| 5.94  | 2.34 | 0.02 | o__Bacillales; f__Bacillaceae; g__Bacillus; s__flexus                             |
| 9.00  | 0.01 | 1.00 | o__Bacillales; f__Paenibacillaceae; g__Paenibacillus                              |
| 2.54  | 0.07 | 0.00 | o__Bacillales; f__Planococcaceae                                                  |
| 0.68  | 0.25 | 1.00 | o__Exiguobacteriales; f__Exiguobacteraceae; g__Exiguobacterium; s__indicum        |
| 0.00  | 0.17 |      | o__Exiguobacteriales; f__Exiguobacteraceae; g__Exiguobacterium; s__indicum        |
| 0.00  | 0.09 |      | p__Gemmatimonadetes; c__Gemm-5; o__; f__; g__; s__                                |
| 0.00  | 0.07 |      | c__Gemmatimonadetes                                                               |
| 0.00  | 0.06 |      | c__Gemmatimonadetes; o__; f__; g__; s__                                           |
| 0.00  | 0.12 |      | c__Gemmatimonadetes; o__; f__; g__; s__                                           |
| 0.00  | 0.07 |      | o__Gemmatimonadales; f__Ellin5301; g__; s__                                       |
| 0.00  | 0.20 |      | c__Gemmatimonadetes; o__N1423WL; f__; g__; s__                                    |
| 0.00  | 0.12 |      | p__Gemmatimonadetes; c__JL-ETNP-Z39; o__; f__; g__; s__                           |
| 0.00  | 0.05 |      | o__Nitrospirales; f__Nitrospiraceae; g__Nitrospira; s__                           |
| 0.00  | 0.11 |      | o__Nitrospirales; f__Nitrospiraceae; g__Nitrospira; s__                           |
| 4.50  | 0.01 | 0.00 | p__Proteobacteria                                                                 |
| 0.00  | 0.04 |      | p__Proteobacteria                                                                 |
| 0.00  | 0.05 |      | p__Proteobacteria                                                                 |
| 0.00  | 0.06 |      | p__Proteobacteria                                                                 |
| 0.08  | 0.10 | 0.00 | o__Caulobacteriales; f__Caulobacteraceae                                          |
| 0.00  | 0.08 |      | o__Rhizobiales; f__Methylobacteriaceae; g__Methylobacterium; s__adhaesivum        |
| 0.00  | 0.11 |      | o__Rhizobiales; f__Phyllobacteriaceae                                             |
| 0.39  | 1.15 | 0.17 | o__Rhizobiales; f__Rhizobiaceae; g__Agrobacterium; s__                            |
| 0.00  | 0.08 |      | o__Rhodobacteriales; f__Rhodobacteraceae; g__Paracoccus; s__marcusii              |
| 0.00  | 0.12 |      | o__Rhodobacteriales; f__Rhodobacteraceae; g__Rhodobacter; s__                     |
| 0.00  | 0.11 |      | o__Rhodobacteriales; f__Rhodobacteraceae; g__Rhodobacter; s__                     |
| 0.00  | 0.08 |      | o__Rhodospirillales; f__Rhodospirillaceae; g__Skermanella; s__                    |

|       |      |      |                                                                    |
|-------|------|------|--------------------------------------------------------------------|
| 0.00  | 0.15 |      | o__Rhodospirillales; f__Rhodospirillaceae; g__Skermanella; s__     |
| 0.00  | 0.18 |      | o__Rhodospirillales; f__Rhodospirillaceae; g__Skermanella; s__     |
| 0.00  | 0.10 |      | o__Sphingomonadales; f__Erythrobacteraceae; g__; s__               |
| 0.00  | 0.05 |      | o__Sphingomonadales; f__Sphingomonadaceae; g__; s__                |
| 0.00  | 0.22 |      | o__Sphingomonadales; f__Sphingomonadaceae; g__Kaistobacter; s__    |
| 0.00  | 0.05 |      | o__Sphingomonadales; f__Sphingomonadaceae; g__Novosphingobium      |
| 0.00  | 0.05 |      | o__Sphingomonadales; f__Sphingomonadaceae; g__Novosphingobium; s__ |
| 5.00  | 0.02 | 0.00 | c__Betaproteobacteria                                              |
| 0.00  | 0.06 |      | c__Betaproteobacteria                                              |
| 0.00  | 0.06 |      | o__Burkholderiales                                                 |
| 0.46  | 0.26 | 0.00 | o__Burkholderiales; f__Alcaligenaceae; g__Achromobacter; s__       |
| 0.74  | 0.07 | 0.75 | o__Burkholderiales; f__Comamonadaceae                              |
| 0.20  | 0.13 | 0.00 | o__Burkholderiales; f__Comamonadaceae                              |
| 0.00  | 0.04 |      | o__Burkholderiales; f__Comamonadaceae                              |
| 0.00  | 0.06 |      | o__Burkholderiales; f__Comamonadaceae                              |
| 0.00  | 0.10 |      | o__Burkholderiales; f__Comamonadaceae                              |
| 0.00  | 0.22 |      | o__Burkholderiales; f__Comamonadaceae                              |
| 0.29  | 3.04 | 0.00 | o__Burkholderiales; f__Comamonadaceae; g__Limnohabitans; s__       |
| 0.00  | 0.06 |      | o__Burkholderiales; f__Comamonadaceae; g__Methylibium; s__         |
| 0.06  | 0.12 | 0.00 | o__Burkholderiales; f__Comamonadaceae; g__Ramlibacter; s__         |
| 4.63  | 0.03 | 0.00 | o__Burkholderiales; f__Oxalobacteraceae                            |
| 0.67  | 0.02 | 0.00 | o__Burkholderiales; f__Oxalobacteraceae                            |
| 0.45  | 0.36 | 0.00 | o__Burkholderiales; f__Oxalobacteraceae                            |
| 0.00  | 0.15 |      | o__Burkholderiales; f__Oxalobacteraceae                            |
| 0.00  | 0.29 |      | o__Burkholderiales; f__Oxalobacteraceae                            |
| 0.00  | 0.25 |      | o__Burkholderiales; f__Oxalobacteraceae; g__; s__                  |
| 0.92  | 0.48 | 0.01 | o__Burkholderiales; f__Oxalobacteraceae; g__Janthinobacterium; s__ |
| 0.59  | 5.34 | 0.00 | o__Burkholderiales; f__Oxalobacteraceae; g__Janthinobacterium; s__ |
| 0.30  | 2.38 | 0.00 | o__Burkholderiales; f__Oxalobacteraceae; g__Janthinobacterium; s__ |
| 0.00  | 0.06 |      | o__Hydrogenophilales; f__Hydrogenophilaceae; g__Thiobacillus; s__  |
| 0.00  | 0.18 |      | o__Methylophilales; f__Methylophilaceae                            |
| 2.12  | 0.18 | 0.00 | o__Methylophilales; f__Methylophilaceae; g__Methylotenera; s__     |
| 0.00  | 0.32 |      | o__Nitrosomonadales; f__Nitrosomonadaceae; g__; s__                |
| 0.00  | 0.06 |      | c__Betaproteobacteria; o__SC-l-84; f__; g__; s__                   |
| 0.00  | 0.08 |      | o__Myxococcales; f__Cystobacteraceae; g__; s__                     |
| 0.00  | 0.10 |      | o__Myxococcales; f__Myxococcaceae                                  |
| 0.00  | 0.06 |      | o__Myxococcales; f__Nannocystaceae; g__Nannocystis; s__            |
| 0.00  | 0.10 |      | o__Syntrophobacterales; f__Syntrophobacteraceae; g__; s__          |
| 32.00 | 0.00 | 0.00 | c__Gammaproteobacteria                                             |
| 18.00 | 0.01 | 0.00 | c__Gammaproteobacteria                                             |
| 6.00  | 0.01 | 0.00 | c__Gammaproteobacteria                                             |
| 2.13  | 0.06 | 0.00 | c__Gammaproteobacteria                                             |
| 1.87  | 0.11 | 0.00 | c__Gammaproteobacteria                                             |



|        |       |      |                                                                      |
|--------|-------|------|----------------------------------------------------------------------|
| 1.33   | 0.43  | 0.01 | c__Gammaproteobacteria                                               |
| 0.22   | 0.17  | 0.00 | c__Gammaproteobacteria                                               |
| 0.00   | 0.04  |      | c__Gammaproteobacteria                                               |
| 0.00   | 0.10  |      | c__Gammaproteobacteria                                               |
| 2.24   | 0.15  | 0.00 | o__Aeromonadales; f__g__; s__                                        |
| 0.11   | 0.06  | 0.00 | o__Aeromonadales; f__g__; s__                                        |
| 3.43   | 0.30  | 0.00 | o__Alteromonadales; f__[Chromatiaceae]; g__; s__                     |
| 129.00 | 0.01  | 0.00 | o__Alteromonadales; f__[Chromatiaceae]; g__Rheinheimera; s__         |
| 5.45   | 0.02  | 0.00 | o__Alteromonadales; f__[Chromatiaceae]; g__Rheinheimera; s__         |
| 0.00   | 0.06  |      | o__Alteromonadales; f__Alteromonadaceae; g__Cellvibrio; s__          |
| 51.00  | 0.00  | 0.00 | o__Enterobacteriales; f__Enterobacteriaceae                          |
| 4.40   | 0.04  | 0.00 | o__Enterobacteriales; f__Enterobacteriaceae                          |
| 4.00   | 0.01  | 0.00 | o__Enterobacteriales; f__Enterobacteriaceae                          |
| 1.73   | 0.04  | 0.00 | o__Enterobacteriales; f__Enterobacteriaceae                          |
| 1.45   | 9.88  | 0.00 | o__Enterobacteriales; f__Enterobacteriaceae                          |
| 0.73   | 1.00  | 0.00 | o__Enterobacteriales; f__Enterobacteriaceae                          |
| 0.37   | 0.60  | 0.00 | o__Enterobacteriales; f__Enterobacteriaceae                          |
| 0.00   | 0.06  |      | o__Enterobacteriales; f__Enterobacteriaceae                          |
| 0.00   | 0.12  |      | o__Enterobacteriales; f__Enterobacteriaceae                          |
| 0.00   | 0.81  |      | o__Enterobacteriales; f__Enterobacteriaceae; g__Buchnera; s__        |
| 0.19   | 0.30  | 0.00 | o__Enterobacteriales; f__Enterobacteriaceae; g__Erwinia              |
| 1.62   | 0.18  | 0.00 | o__Enterobacteriales; f__Enterobacteriaceae; g__Erwinia; s__         |
| 0.66   | 0.75  | 0.00 | o__Enterobacteriales; f__Enterobacteriaceae; g__Erwinia; s__         |
| 0.57   | 2.05  | 0.14 | o__Enterobacteriales; f__Enterobacteriaceae; g__Erwinia; s__         |
| 0.00   | 0.13  |      | o__Pseudomonadales; f__Moraxellaceae; g__Alkanindiges; s__           |
| 0.00   | 0.64  |      | o__Pseudomonadales; f__Moraxellaceae; g__Alkanindiges; s__           |
| 40.00  | 0.00  | 0.01 | o__Pseudomonadales; f__Pseudomonadaceae                              |
| 9.72   | 0.05  | 0.02 | o__Pseudomonadales; f__Pseudomonadaceae                              |
| 2.18   | 0.10  | 0.03 | o__Pseudomonadales; f__Pseudomonadaceae                              |
| 1.64   | 0.03  | 0.00 | o__Pseudomonadales; f__Pseudomonadaceae                              |
| 1.15   | 0.17  | 0.17 | o__Pseudomonadales; f__Pseudomonadaceae                              |
| 0.71   | 0.50  | 0.32 | o__Pseudomonadales; f__Pseudomonadaceae                              |
| 0.18   | 0.86  | 0.28 | o__Pseudomonadales; f__Pseudomonadaceae                              |
| 6.34   | 0.05  | 0.05 | o__Pseudomonadales; f__Pseudomonadaceae; g__; s__                    |
| 3.30   | 0.02  | 0.00 | o__Pseudomonadales; f__Pseudomonadaceae; g__; s__                    |
| 1.94   | 0.04  | 0.00 | o__Pseudomonadales; f__Pseudomonadaceae; g__; s__                    |
| 0.16   | 0.07  | 0.00 | o__Pseudomonadales; f__Pseudomonadaceae; g__; s__                    |
| 0.00   | 0.09  |      | o__Pseudomonadales; f__Pseudomonadaceae; g__; s__                    |
| 1.67   | 22.98 | 0.44 | o__Pseudomonadales; f__Pseudomonadaceae; g__Pseudomonas              |
| 0.25   | 0.16  | 0.63 | o__Pseudomonadales; f__Pseudomonadaceae; g__Pseudomonas              |
| 0.00   | 0.05  |      | o__Pseudomonadales; f__Pseudomonadaceae; g__Pseudomonas              |
| 0.00   | 0.10  |      | o__Pseudomonadales; f__Pseudomonadaceae; g__Pseudomonas              |
| 0.03   | 0.13  | 1.00 | o__Pseudomonadales; f__Pseudomonadaceae; g__Pseudomonas; s__stutzeri |

|      |      |      |                                                                         |
|------|------|------|-------------------------------------------------------------------------|
| 0.48 | 9.38 | 0.98 | o__Pseudomonadales; f__Pseudomonadaceae; g__Pseudomonas; s__viridiflava |
| 0.00 | 0.08 |      | o__Pseudomonadales; f__Pseudomonadaceae; g__Pseudomonas; s__viridiflava |
| 0.00 | 0.09 |      | o__Thiotrichales; f__Piscirickettsiaceae; g__Methylophaga; s__          |
| 0.00 | 0.05 |      | o__Xanthomonadales; f__Sinobacteraceae; g__; s__                        |
| 0.00 | 0.06 |      | o__Xanthomonadales; f__Sinobacteraceae; g__Steriodobacter; s__          |
| 1.01 | 1.25 | 0.23 | o__Xanthomonadales; f__Xanthomonadaceae                                 |
| 0.00 | 0.06 |      | o__Xanthomonadales; f__Xanthomonadaceae                                 |
| 0.00 | 0.15 |      | o__Xanthomonadales; f__Xanthomonadaceae; g__Lysobacter; s__             |
| 0.00 | 0.16 |      | o__Xanthomonadales; f__Xanthomonadaceae; g__Lysobacter; s__             |
| 0.22 | 0.15 | 1.00 | o__Xanthomonadales; f__Xanthomonadaceae; g__Rhodanobacter; s__          |
| 3.23 | 0.32 | 0.01 | o__Xanthomonadales; f__Xanthomonadaceae; g__Stenotrophomonas            |
| 0.00 | 0.07 |      | o__Xanthomonadales; f__Xanthomonadaceae; g__Thermomonas; s__            |
| 0.00 | 0.17 |      | o__Xanthomonadales; f__Xanthomonadaceae; g__Thermomonas; s__            |
| 0.00 | 0.36 |      | o__Xanthomonadales; f__Xanthomonadaceae; g__Thermomonas; s__            |
| 0.00 | 0.06 |      | o__[Pedosphaerales]; f__; g__; s__                                      |
| 0.00 | 0.12 |      | o__[Pedosphaerales]; f__Ellin517; g__; s__                              |

This table includes all OTUs that were observed as 1% or more of the reads from at least one individual sample of total bacteria from plants, soil, or water.

Samples were excluded from this analysis when there were insufficient HTS reads (fewer than 200) from the corresponding cultured reads, since an estimate of culturability would be unreliable without these measurements; this excluded June romaine samples and April water samples.

“Culturability” values were color-coded: Orange for OTUs that were never observed in culture, and a white-green gradient for those that were observed.

“% of total” is the observation frequency of any culture-independent OTU in relation to all OTU reads from culture-independent samples combined at rarefied proportions equal to their proportions in the culture library (8 spinach: 4 romaine [April only]: 8 head lettuce: 2 irrigation water [June only]: and 6 soil), and calculates. We utilize a red gradient color-coding of “% total” for more rapid visual inspection.

“% surfactant” was calculated as the estimated # of colonies of that OTU that were classified as surfactant producers divided by the total estimated # of colonies of that OTU that were cultured (see materials and methods for estimation calculations.) No numbers are recorded for OTUs that were not cultured, and a blue color-coding captures OTUs with higher likelihoods of having been characterized as surfactant producers.
